# Supplementary material for: Impact of Air Pollution on the Composition and Diversity of Human Gut Microbiota in General and Vulnerable Populations: A Systematic Review
Source: MDPI journal article supplement (doi:10.3390/toxics10100579), 2022-09-30
Supplement: s1 [file s1]

# Supplementary Materials: Impact of Air Pollution on the Composition and Diversity of Human Gut Microbiota in General and Vulnerable Populations: A Systematic Review

Simone Filardo, Marisa Di Pietro, Carmela Protano, Arianna Antonucci, Matteo Vitali and Rosa Sessa

**Table S1.** NOS score of the studies included in the systematic review.

| Author                      | Year | NOS Score |
|-----------------------------|------|-----------|
| Alderete <i>et al.</i> [34] | 2018 | 5         |
| Liu <i>et al.</i> [25]      | 2019 | 7         |
| Fouladi <i>et al.</i> [28]  | 2020 | 6         |
| Zheng <i>et al.</i> [30]    | 2020 | 6         |
| Vari <i>et al.</i> [33]     | 2021 | 6         |
| Du <i>et al.</i> [29]       | 2021 | 5         |
| Yi <i>et al.</i> [32]       | 2021 | 7         |
| Gan <i>et al.</i> [27]      | 2022 | 5         |
| Li <i>et al.</i> [26]       | 2022 | 7         |
| Zhao <i>et al.</i> [31]     | 2022 | 7         |
